# Supplementary material for: Efficacy of Nanofiber Sheets Incorporating Lenvatinib in a Hepatocellular Carcinoma Xenograft Model
Source: MDPI journal article supplement (doi:10.3390/nano12081364), 2022-04-15
Supplement: s1 [file s1]

## Supplementary Materials

# Efficacy of Nanofiber Sheets Incorporating Lenvatinib in a Hepatocellular Carcinoma Xenograft Model

Terufumi Yoshida <sup>1</sup>, Masaki Kaibori <sup>1,\*</sup>, Nanami Fujisawa <sup>2</sup>, Mariko Ishizuka <sup>1</sup>, Fusao Sumiyama <sup>1</sup>, Masahiko Hatta <sup>1</sup>, Hisashi Kosaka <sup>1</sup>, Kosuke Matsui <sup>1</sup>, Kensuke Suzuki <sup>3</sup>, Tomoya O. Akama <sup>4</sup>, Tayo Katano <sup>5</sup>, Kengo Yoshii <sup>6</sup>, Mitsuhiro Ebara <sup>2</sup> and Mitsugu Sekimoto <sup>1</sup>

- <sup>1</sup> Department of Surgery, Kansai Medical University, 2-5-1 Shinmachi, Hirakata 573-1010, Japan; yoshiter@hirakata.kmu.ac.jp (T.Y.); ishizukm@takii.kmu.ac.jp (M.I.); sumiyamf@hirakata.kmu.ac.jp (F.S.); hattamas@hirakata.kmu.ac.jp (M.H.); kosakahi@hirakata.kmu.ac.jp (H.K.); matsuk@hirakata.kmu.ac.jp (K.M.); sekimotm@hirakata.kmu.ac.jp (M.S.)
- <sup>2</sup> Research Center for Functional Materials, National Institute for Materials Science (NIMS), Tsukuba 305-0044, Japan; nfujisawa.tokyo@gmail.com (N.F.); ebara.mitsuhiro@nims.go.jp (M.E.)
- <sup>3</sup> Department of Otolaryngology, Head and Neck Surgery, Kansai Medical University, Hirakata 573-1010, Japan; suzukken@hirakata.kmu.ac.jp
- <sup>4</sup> Department of Pharmacology, Kansai Medical University, Hirakata 573-1010, Japan; akamat@hirakata.kmu.ac.jp
- <sup>5</sup> Department of Medical Chemistry, Kansai Medical University, Hirakata 573-1010, Japan; katanot@hirakata.kmu.ac.jp
- <sup>6</sup> Department of Mathematics and Statistics in Medical Sciences, Kyoto Prefectural University of Medicine, Kyoto 606-0823, Japan; yoshii-k@koto.kpu-m.ac.jp
- \* Correspondence: kaibori@hirakata.kmu.ac.jp; Tel.: +81-72-804-0101 (ext. 56130)

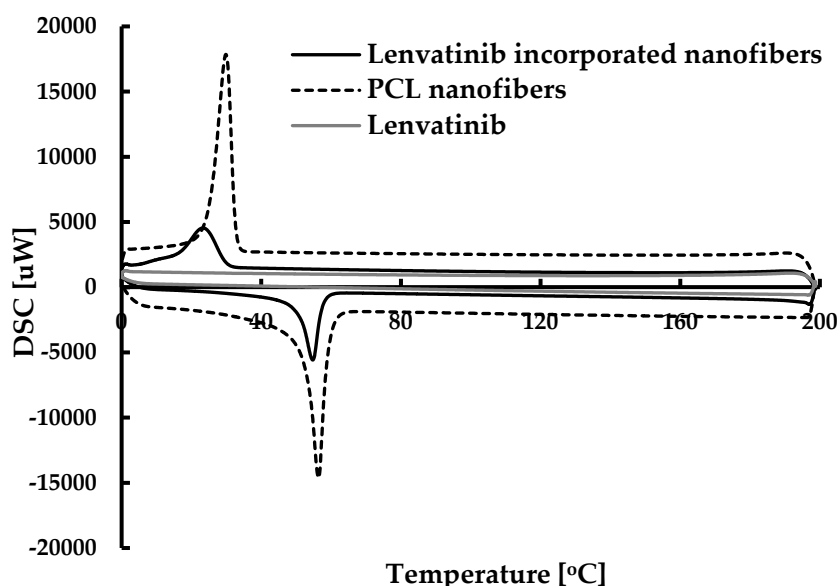

**Figure S1:** DSC curves of lenvatinib incorporated nanofibers, PCL nanofibers and lenvatinib.
